# Supplementary material for: Preparation and isolation of mono-Nb substituted Keggin-type phosphomolybdic acid and its application as an oxidation catalyst for isobutylaldehyde and Wacker-type oxidation
Source: Royal Society of Chemistry journal article supplement (doi:10.1039/d3dt02451b), 2023-01-01
Supplement: d3dt02451b1.pdf [file d3dt02451b1.pdf]

Supplementary Material

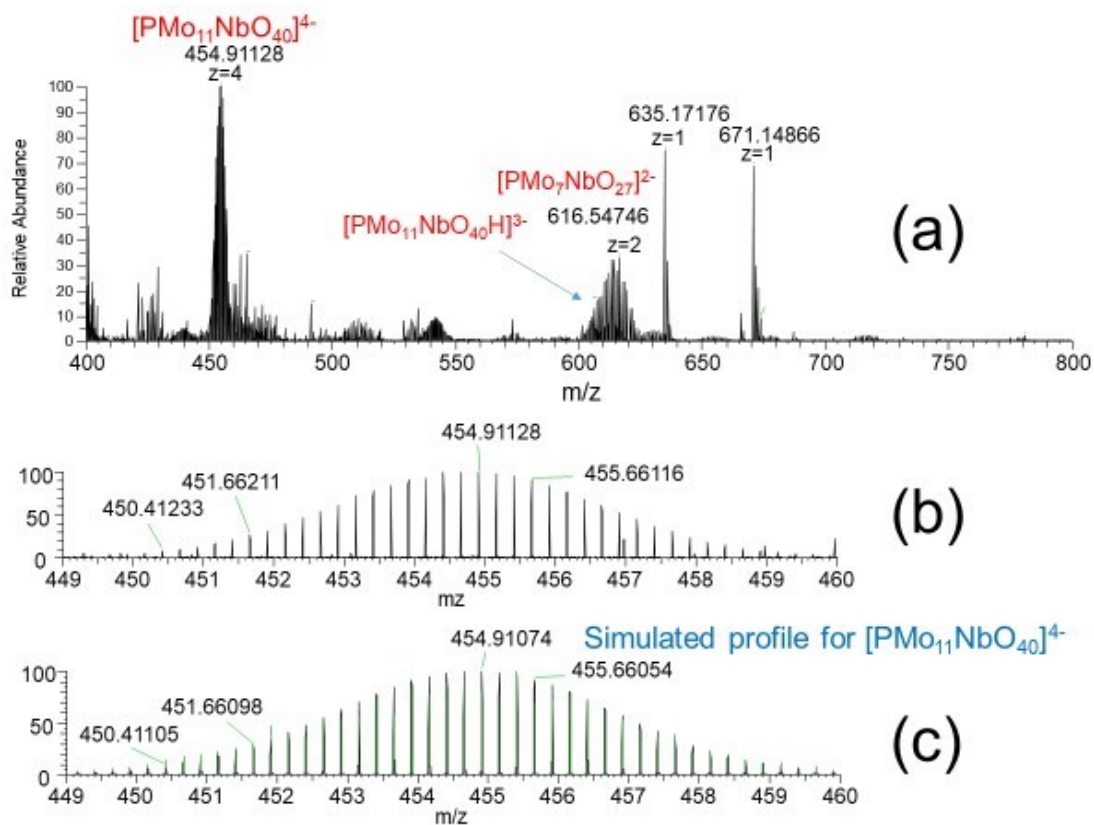

**Figure S1.** High-resolution ESI-MS spectra of reaction mixture of  $H_3PMo_{12}O_{40}$  and  $K_8Nb_6O_{19}$  (1 equivalent of Nb to  $H_3PMo_{12}O_{40}$ ) which was heated at 85 °C for 3 h followed by centrifugation. The resulting solution was then dissolved in acetonitrile. (a)  $m/z = 400$ –800. (b) Enlarged  $m/z = 449$ –460, and (c) simulated profile of  $[PMo_{11}NbO_{40}]^{4-}$ .

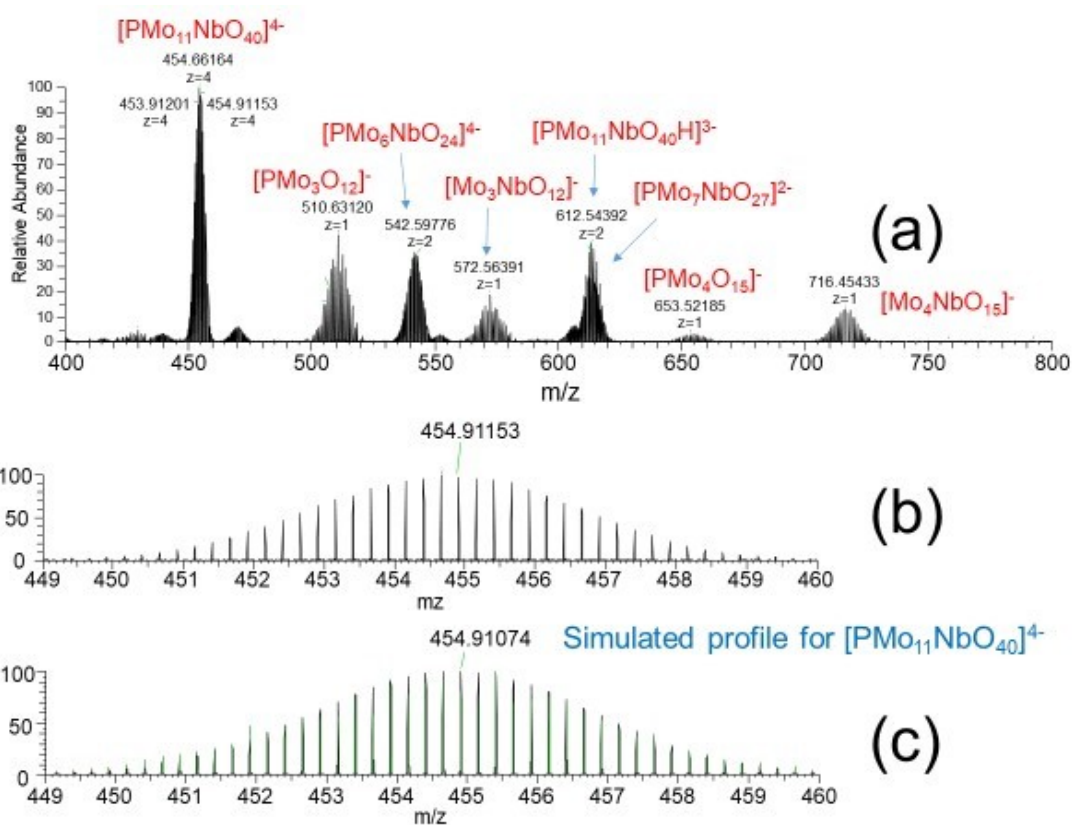

**Figure S2.** High-resolution ESI-MS spectra of the solid obtained by freeze-drying a solution of  $\text{H}_3\text{KPMo}_{11}\text{NbO}_{40}$  dissolved in acetonitrile. (a)  $m/z = 400\text{--}800$ . (b) Enlarged  $m/z = 449\text{--}460$ , and (c) simulated profile of  $[\text{PMo}_{11}\text{NbO}_{40}]^{4-}$ .

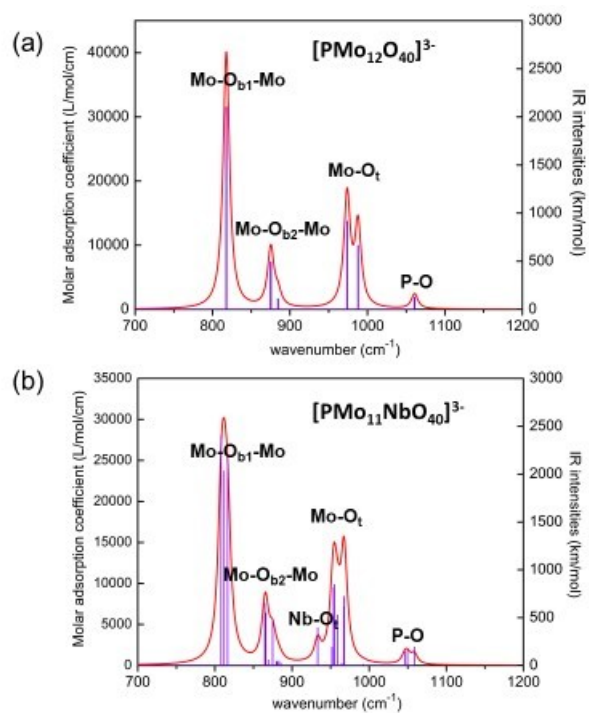

**Figure S3.** Simulated IR spectra of (a) [PMo<sub>12</sub>O<sub>40</sub>]<sup>3-</sup> and (b) [PMo<sub>11</sub>NbO<sub>40</sub>]<sup>3-</sup> at the B3LYP/6+31+G(d, p)/SDD level.

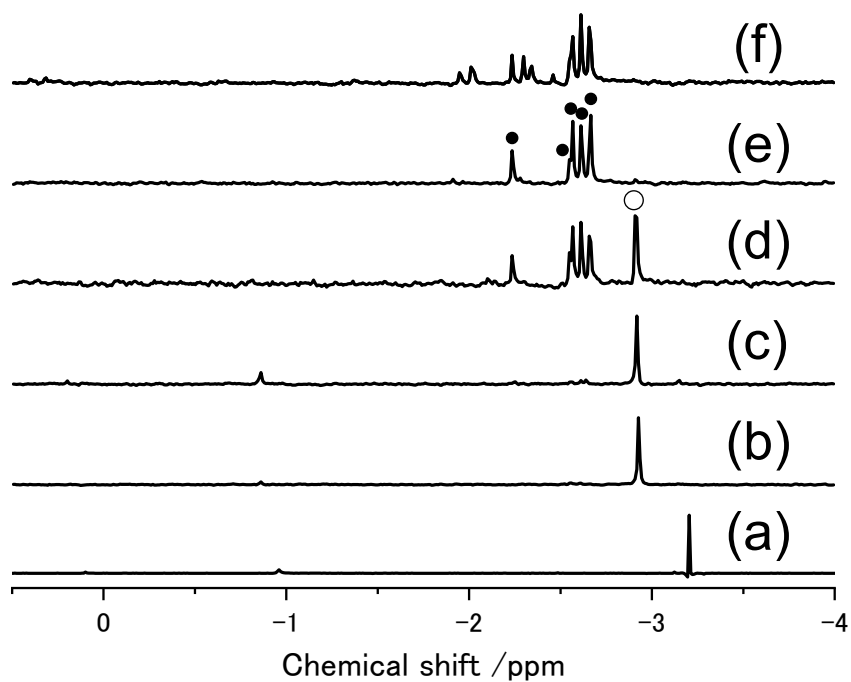

**Figure S4.**  $^{31}\text{P}$  NMR spectra of (a)  $\text{H}_3\text{PMo}_{12}\text{O}_{40}$  (0.15 M) and the solid obtained after freeze-drying the reaction mixture of  $\text{H}_3\text{PMo}_{12}\text{O}_{40}$  (0.15 M) with (b) 1, (c) 2, (d) 3, (e) 4, and (f) 5 equiv of Nb ( $\text{K}_8\text{Nb}_6\text{O}_{19}$ ) in  $\text{H}_2\text{O}$ . The reaction mixture was heated at  $85\text{ }^\circ\text{C}$  for 3 h, and the precipitate was removed by centrifugation. The open circles and five closed circles indicate peaks assignable to  $[\text{PMo}_{11}\text{NbO}_{40}]^{4-}$  and  $[\text{PMo}_{10}\text{Nb}_2\text{O}_{40}]^{6-}$ , respectively. The solid ( $\sim 30\text{ mg}$ ) was dissolved in  $\text{D}_2\text{O}$  ( $\sim 1\text{ mL}$ ).

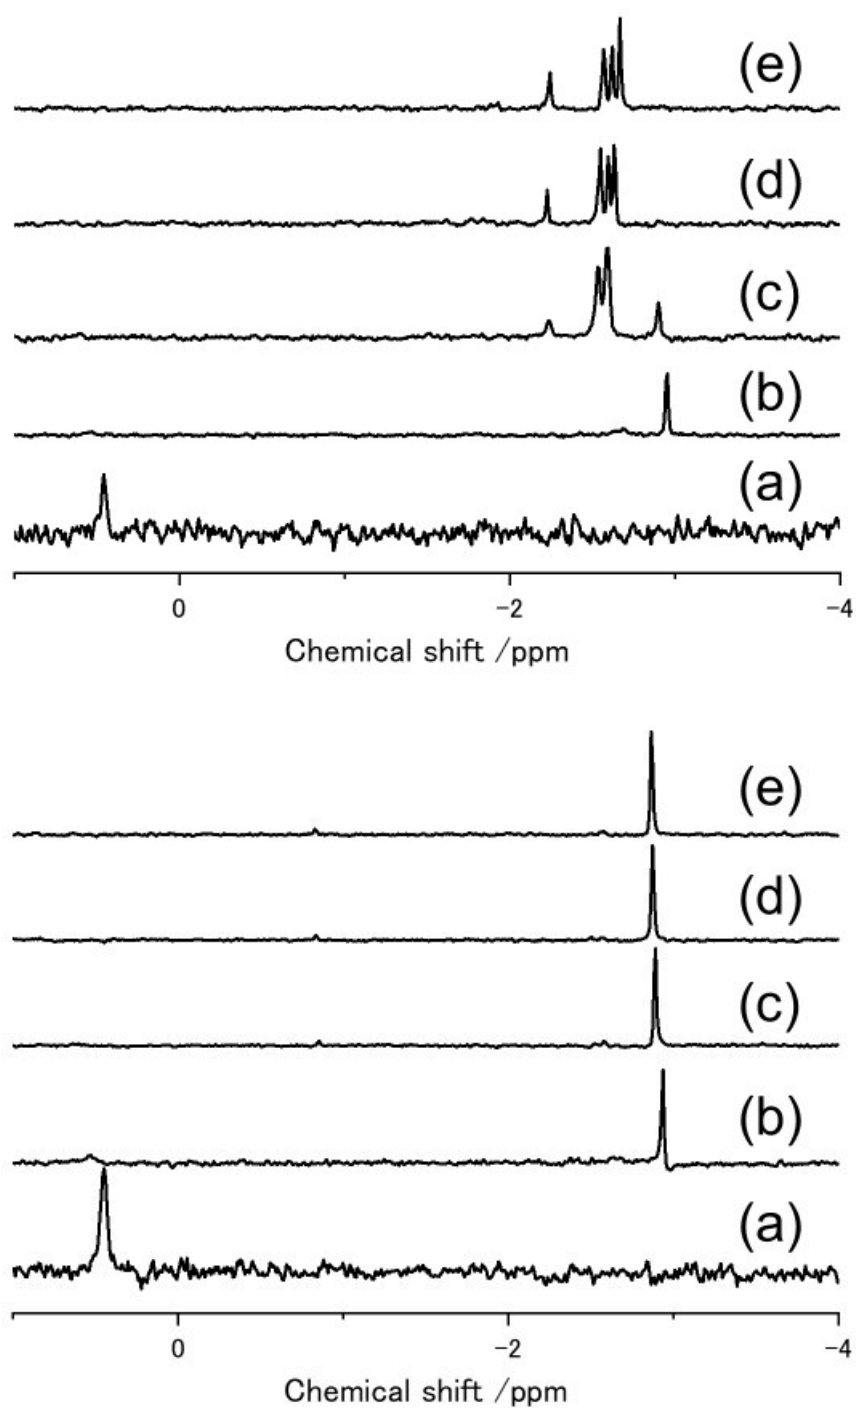

**Figure S5.**  $^{31}\text{P}$  NMR spectra of (top)  $\text{K}_5[\text{PMo}_{10}\text{Nb}_2\text{O}_{40}]$  and (bottom)  $\text{H}_3\text{K}[\text{PMo}_{11}\text{NbO}_{40}]$  in (a) 6 M HCl, (b) 1.2 M HCl, (c) 0.24 M HCl, (d) 0.048 M HCl, and (e) 0.0096 M HCl aqueous solution.

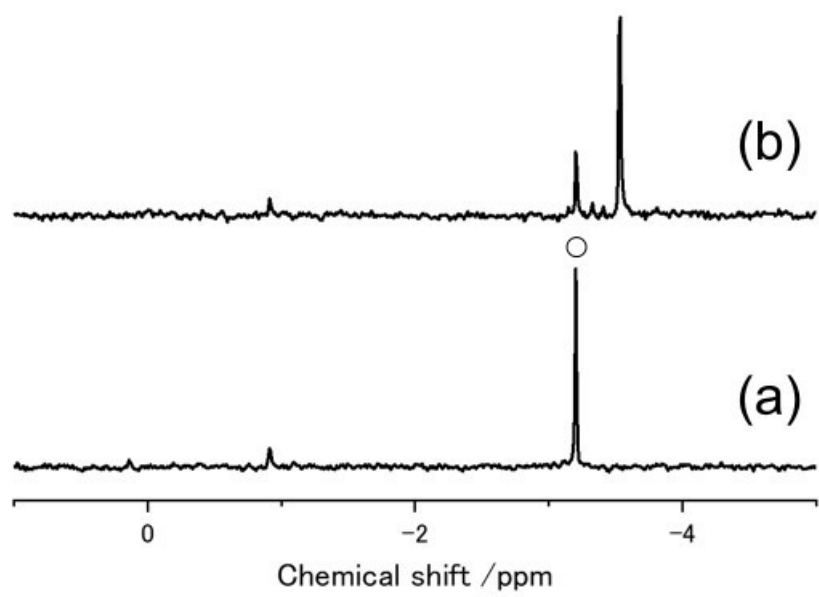

**Figure S6.**  $^{31}\text{P}$  NMR spectra of (a)  $\text{H}_3[\text{PMo}_{12}\text{O}_{40}]$  and (b)  $\text{H}_4[\text{PMo}_{11}\text{VO}_{40}]$ . Solid ( $\sim 30$  mg) was dissolved with  $\text{D}_2\text{O}$  ( $\sim 1$  mL).
